# Supplementary material for: Coupled plasmons induce broadband circular dichroism in patternable films of silver nanoparticles with chiral ligands
Source: Royal Society of Chemistry journal article supplement (doi:10.1039/c3nr03244b), 2013-01-01
Supplement: c3nr03244b.pdf [file c3nr03244b.pdf]

## Supporting Information

### Coupled Plasmons Induce Broadband Circular Dichroism in Patternable Films of Silver Nanoparticles with Chiral Ligands

Xavier Vidal<sup>a,b</sup>, Won Jin Kim<sup>a</sup>, Alexander Baev<sup>a</sup>, Valentyna Tokar<sup>a,c</sup>, Hongsub Jee<sup>a</sup>, Mark. T. Swihart<sup>a,d</sup> and Paras N. Prasad<sup>\*a,e,f,g</sup>

<sup>a</sup> Institute for Lasers, Photonics and Biophotonics, University at Buffalo, The State University of New York, Buffalo, New York, 14260, USA.

<sup>b</sup> Department of Physics and Astronomy, Macquarie University, New South Wales, 2109, Australia. Fax: (+61)298508115; Tel: (+61)298506368; E-mail: xavier.vidal@mq.edu.au

<sup>c</sup> Faculty of Physics, Taras Shevchenko National University of Kyiv, 64 Volodymyrska st., Kyiv, 01601, Ukraine.

<sup>d</sup> Department of Chemical and Biological, Engineering, University at Buffalo, The State University of New York, Buffalo, New York, 14260, USA. E-mail: swihart@buffalo.edu

<sup>e</sup> Department of Chemistry, University at Buffalo, State University of New York, Buffalo, New York, 14260, USA. E-mail: pnprasad@buffalo.edu

<sup>f</sup> Department of Electrical Engineering, University at Buffalo, State University of New York, Buffalo, New York, 14260, USA.

<sup>g</sup> Department of Chemistry, Korea University.

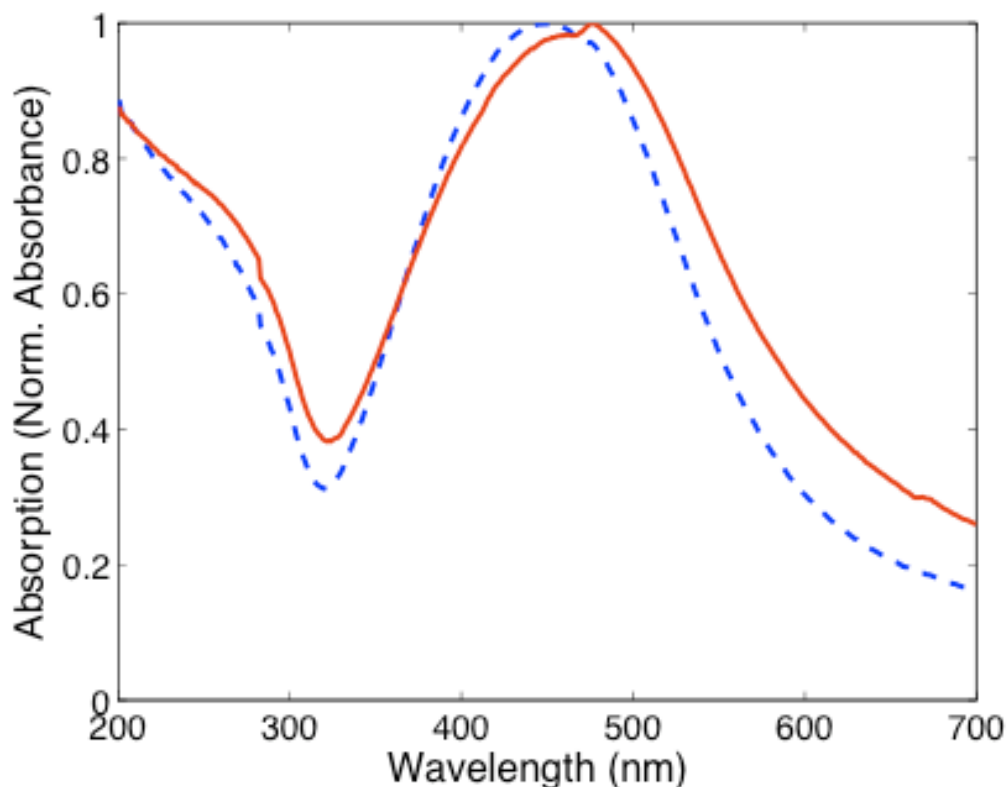

**S-Figure 1** Absorption spectra of protected *t*-BOC Ag NP film (red solid line) before patterning and deprotected *t*-BOC Ag NP film (blue dashed line) after patterning.
